# Supplementary material
Source: publisher figshare collection journal article supplement (https://karger.figshare.com/ndownloader/files/37424707)
Supplement: Supplementary file 1 [file 37424707]

Supplemental table 2: Histological findings according to number of large INVs

| Number of large INVs | LINVs Q1 | LINVs Q2 | LINVs Q3 | LINVs Q4 | P value |
| --- | --- | --- | --- | --- | --- |
|  | Q1≤2 | 3≤Q2≤5 | 6≤Q3≤12 | 13≤Q4 |  |
|  | n=37 | n=25 | n=25 | n=28 |  |
| Histological findings |  |  |  |  |  |
| Plaque area, mm2* | 212±83 | 217±116 | 252±115 | 271±135 | 0.14 |
| Plaque rupture | 20 (54.1%) | 10 (40.0%) | 14 (56.0%) | 4 (14.3%) | 0.004 |
| Thinnest fibrous cap, μm† | 65 (18-219) | 51 (26-134) | 79 (17-133) | 277 (78-512) | 0.001 |
| Density of neovessels* | 1.03±0.68 | 1.34±0.93 | 1.57±0.75 | 2.01±0.92 | <0.001 |
| Presence of intraplaque hemorrhage | 30 (81.1%) | 22 (88.0%) | 21 (84.0%) | 23 (82.1%) | 0.9 |
| Intraplaque hemorrhage area, mm2* | 5.3±5.4 | 5.5±5.9 | 12.3±20.7 | 9.1±12.3 | 0.11 |
| Cholesterol area, mm2† | 22.8 (8.1-48.9) | 18.4 (3.4-38.3) | 23.4 (1.6-51.0) | 13.6 (1.2-21.8) | 0.16 |
| Calcification area**,** mm2† | 5.8±8.1 | 11.1±11.2 | 6.7±10.8 | 15.7±23.2 | 0.12 |

SINVs, small intraplaque neovessels; LINVs, large intraplaque neovessels; Q, quartile; Vas-G0, vascular grade at 0 minutes; Vas-G10, vascular grade at 10 minutes. Data are expressed as mean ± standard deviation, median (1st and 3rd quartiles) or number (percentage) of subjects.

*: Analysis of variance; †: Kruskal-Wallis test.
